# Supplementary material for: Exposure of Triclosan in Porcine Oocyte Leads to Superoxide Production and Mitochondrial-Mediated Apoptosis during In Vitro Maturation
Source: PubMed Central journal article supplement (PMC7246582; doi:10.3390/ijms21093050), 2020-04-26
Supplement: ijms-21-03050-s001.pdf [file ijms-21-03050-s001.pdf]

a) Experimental methods of TCS treatments (Fig.1 – 3)

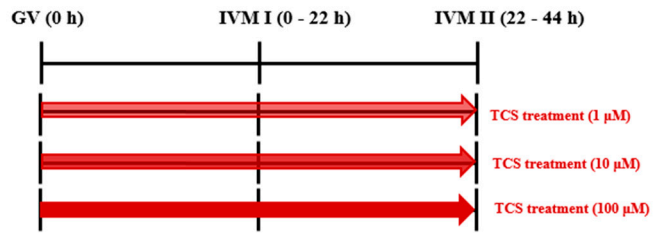

b) Recovery experiment: treatment conditions (Fig. 4)

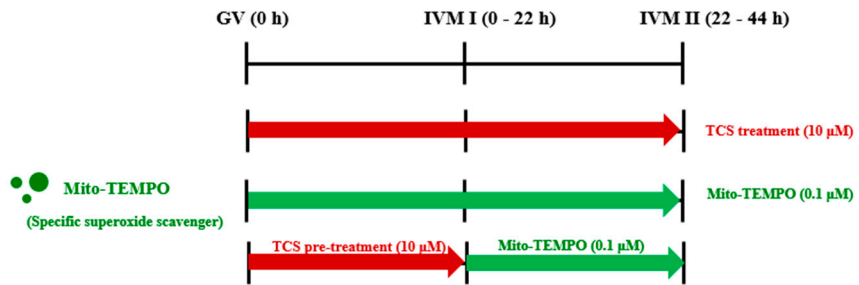

Supplementary Figure 1 Graphical description of TCS and/or Mito-TEMPO treatment in porcine oocyte maturation
